# Supplementary material for: Layer-structure-suppressed concentration quenching of Dy3+ luminescence and the realization of a single phase white light-emitting phosphor cooperated with Tm3+
Source: Royal Society of Chemistry journal article supplement (doi:10.1039/d2qi00830k), 2022-01-01
Supplement: d2qi00830k1.pdf [file d2qi00830k1.pdf]

## Supporting Information

### **Layer-structure-suppressed concentration quenching of Dy<sup>3+</sup> luminescence and the realization of a single phase white light-emitting phosphor cooperated with Tm<sup>3+</sup>**

Feiyan Xie,<sup>ab</sup> Junhao Li,<sup>c\*</sup> Dekang Xu,<sup>b\*</sup> Hualan Xu,<sup>a</sup> Shuifu Liu,<sup>d</sup> Yinuan Li,<sup>b</sup> Yuhong Wen,<sup>b</sup> Peilan Zhang<sup>b</sup> and Shengliang Zhong<sup>a\*</sup>

<sup>a</sup>Research Center for Ultrafine Powder Materials, College of Chemistry and Chemical Engineering, Jiangxi Normal University, Nanchang 330022, P. R. China

<sup>b</sup>School of Chemistry and Materials Engineering, Huizhou University, Huizhou 516007, P. R. China

<sup>c</sup>Guangdong Province Key Laboratory of Rare Earth Development and Application, Institute of Resources Utilization and Rare Earth Development, Guangdong Academy of Sciences, Guangzhou 510651, P. R. China

<sup>d</sup>School of Marine Sciences, Sun Yat-Sen University Zhuhai 519082, P. R. China

\*Corresponding authors

Email:

junhaoli0317@qq.com; xudek@hzu.edu.cn; slzhong@jxnu.edu.cn

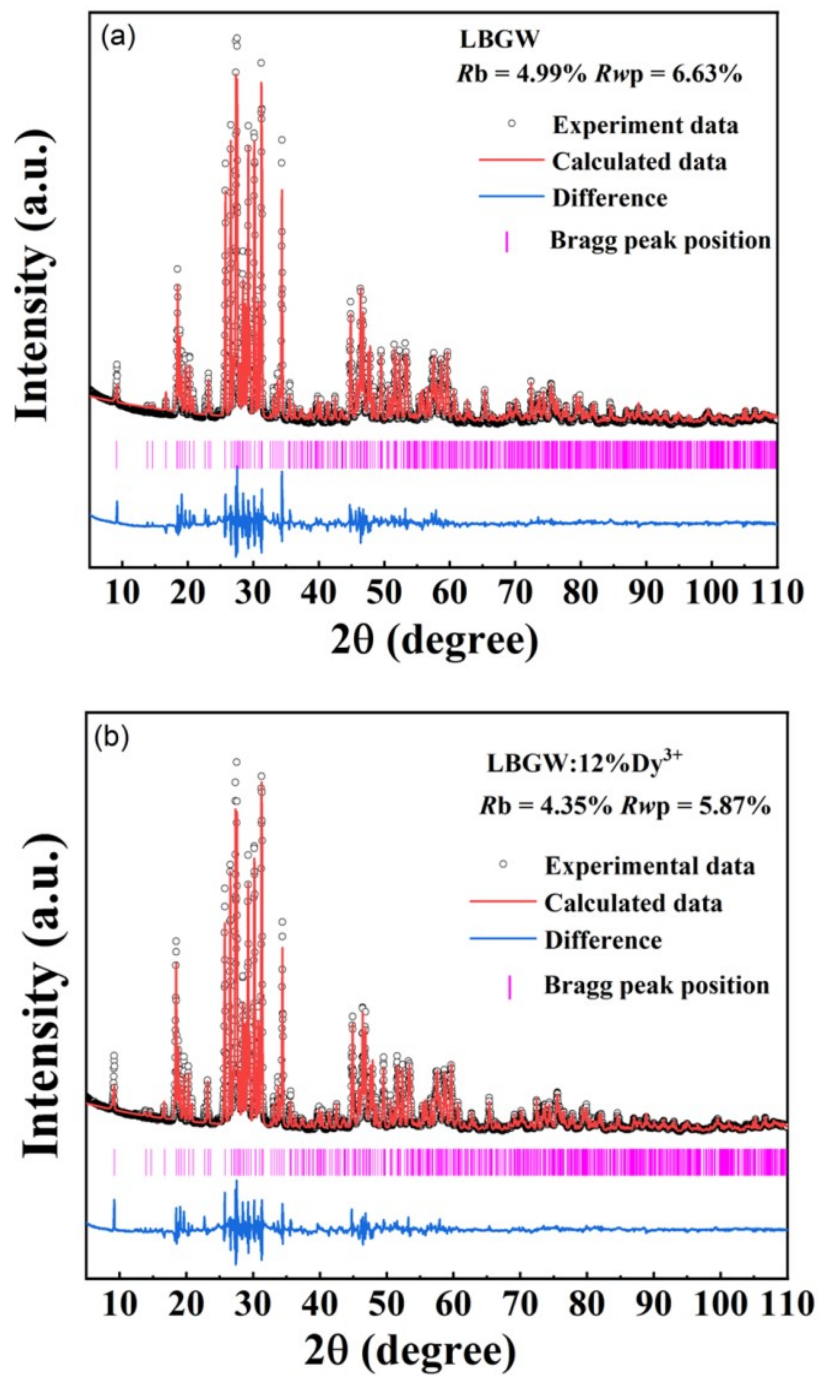

Fig. S1 The Rietveld XRD refinement of LBGW and LBGW:12%Dy<sup>3+</sup> phosphor powder X-ray patterns.

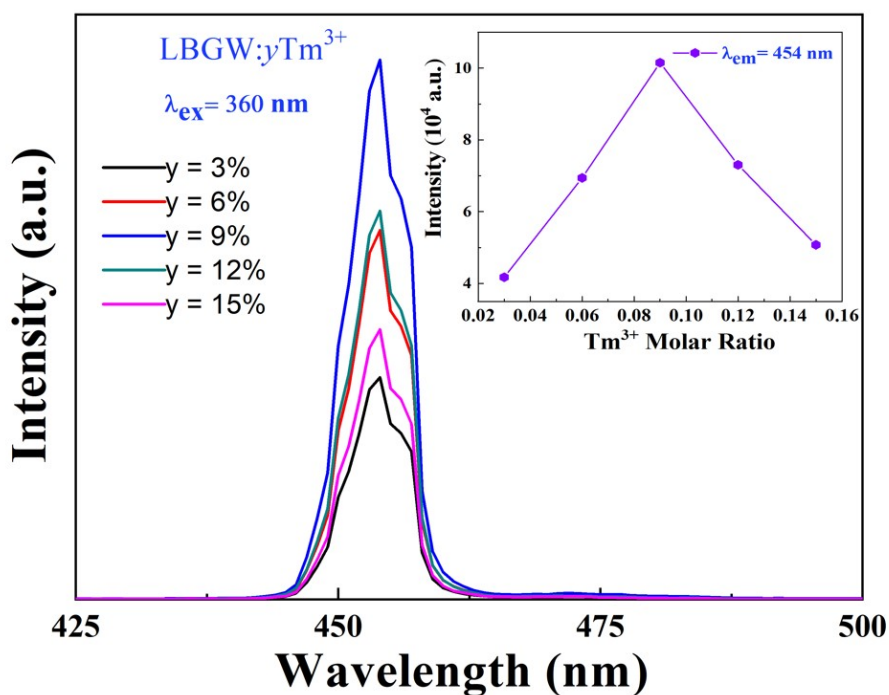

**Fig.S2** The PL spectra of LBGW:yTm<sup>3+</sup>. The inset shows the relationship between Tm<sup>3+</sup> doping concentration and luminescence intensity.

It can be seen in Fig.S2 that with the increase of Tm<sup>3+</sup> doping concentration, the luminescence intensity of LBGW:Tm<sup>3+</sup> increases continuously. When the concentration of Tm<sup>3+</sup> reaches 9%, the luminescence intensity reaches the maximum value, and then the luminescence intensity begins to decrease. Similar to the doping of Dy<sup>3+</sup>, Tm<sup>3+</sup> has a relatively high doping concentration in this matrix.

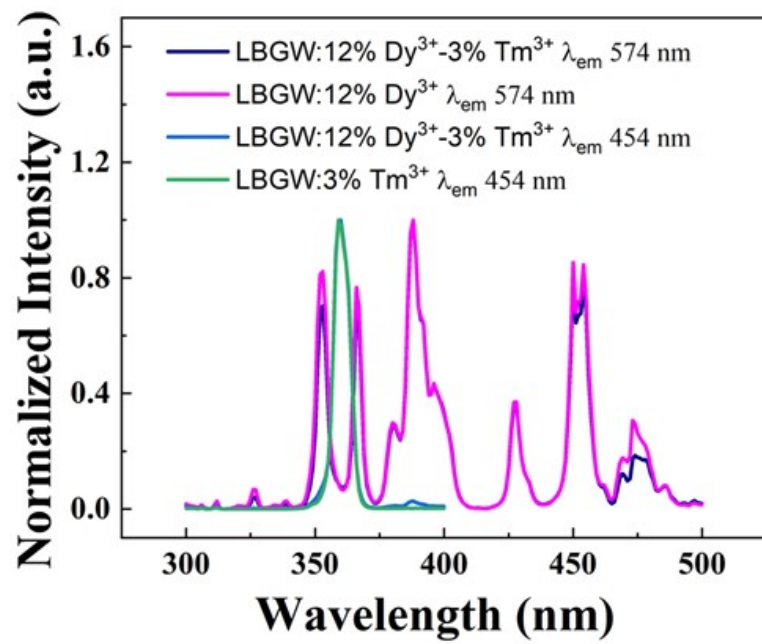

**Fig.S3** PLE spectra of LBGW:12%Dy<sup>3+</sup>, LBGW:12%Dy<sup>3+</sup>,3%Tm<sup>3+</sup> and LBGW:3%Tm<sup>3+</sup>, LBGW:12%Dy<sup>3+</sup>,3%Tm<sup>3+</sup> were monitored at 574 nm and 454 nm emission wavelengths, respectively.

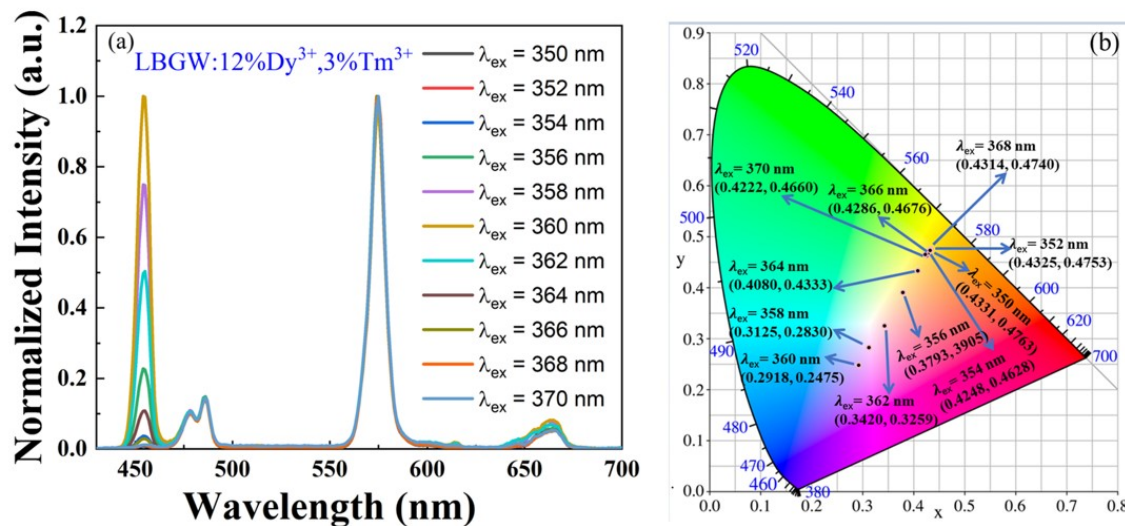

Fig.S4 (a) PL spectra and (b) Chromaticity diagram of the LBGW:12%Dy<sup>3+</sup>,3%Tm<sup>3+</sup> phosphor at different excitation wavelengths.

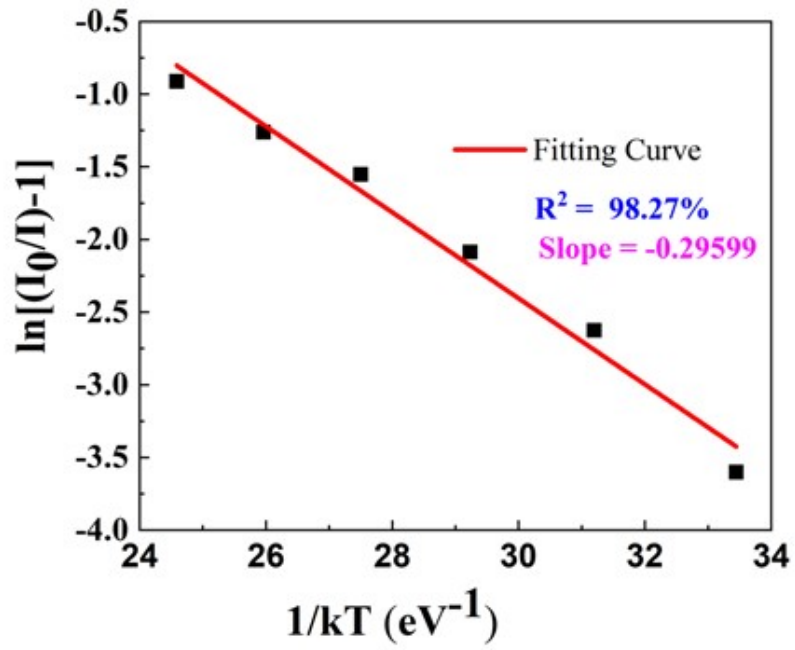

**Fig.S5** The graph of  $\ln[(I_0/I) - 1]$  verses  $1/kT$  for LBGW:12%Dy<sup>3+</sup>,3%Tm<sup>3+</sup>.

**Table S1.** Fractional atomic coordinates and isotropic displacement parameters ( $\text{\AA}^2$ ) of LBGW.

| Atom | <i>x</i>  | <i>y</i>  | <i>z</i>  | $B_{\text{iso}}$ | <i>Occ.</i> |
|------|-----------|-----------|-----------|------------------|-------------|
| W1   | 0.4060    | 0.4894(3) | 0.4414(1) | 0.5488(6)        | 1           |
| W2   | 0.3499(2) | 0.4997(7) | 0.7428(3) | 0.5638(4)        | 1           |
| Ba3  | 0.2500    | 1.0000    | 0.5200(6) | 0.5480(3)        | 1           |
| Y4   | 0.4684(8) | 1.0066(2) | 0.6476(9) | 0.5267(2)        | 0.75        |
| Li4  | 0.4689(6) | 1.0052(9) | 0.6474(4) | 0.3307(3)        | 0.25        |
| Li5  | 0.2500    | 0.5000    | 0.2520(8) | 0.5478(9)        | 1           |
| O1   | 0.3234(5) | 0.6211    | 0.4344(2) | 0.5483(4)        | 1           |
| O2   | 0.4018(6) | 0.2645(3) | 0.5504(3) | 0.5477(6)        | 1           |
| O3   | 0.4669(6) | 0.7951(9) | 0.4967(3) | 0.5487(4)        | 1           |
| O4   | 0.4515(5) | 0.2338(1) | 0.3494(9) | 0.5496(5)        | 1           |
| O5   | 0.2887    | 0.2512(6) | 0.6894(4) | 0.5492(6)        | 1           |
| O6   | 0.3861(6) | 0.7920(8) | 0.6444(4) | 0.5494           | 1           |
| O7   | 0.3221(3) | 0.6167(9) | 0.8807(1) | 0.5468(4)        | 1           |
| O8   | 0.5288(7) | 0.4879(9) | 0.8503(9) | 0.5434(7)        | 1           |

**Table S2.** Fractional atomic coordinates and isotropic displacement parameters ( $\text{\AA}^2$ ) of LBGW:12% Dy<sup>3+</sup>.

| Atom | <i>x</i>  | <i>y</i>  | <i>z</i>  | <i>B</i> <sub>iso</sub> | <i>Occ.</i> |
|------|-----------|-----------|-----------|-------------------------|-------------|
| W1   | 0.4063(9) | 0.4903(5) | 0.4415(4) | 0.7098                  | 1           |
| W2   | 0.3504(1) | 0.5001(2) | 0.7435(9) | 0.7098                  | 1           |
| Ba3  | 0.2500    | 1.0000    | 0.5301(8) | 0.7098                  | 1           |
| Y4   | 0.4682(4) | 1.0067(3) | 0.6458(4) | 0.7098                  | 0.75        |
| Li4  | 0.4682(4) | 1.0067(3) | 0.6458(4) | 0.7098                  | 0.25        |
| Li5  | 0.2500    | 0.5000    | 0.2497    | 0.7098                  | 1           |
| O1   | 0.3245(1) | 0.6466(2) | 0.4337(2) | 0.7098                  | 1           |
| O2   | 0.4021(7) | 0.2524(1) | 0.5435    | 0.7098                  | 1           |
| O3   | 0.4666(8) | 0.8001(7) | 0.4987(8) | 0.7098                  | 1           |
| O4   | 0.4546(9) | 0.2342(5) | 0.3511(7) | 0.7098                  | 1           |
| O5   | 0.3171(1) | 0.2304(7) | 0.6905    | 0.7098                  | 1           |
| O6   | 0.3752(1) | 0.7708(3) | 0.6408(3) | 0.7098                  | 1           |
| O7   | 0.3242(9) | 0.6207    | 0.8868(2) | 0.7098                  | 1           |
| O8   | 0.5272(6) | 0.4911(4) | 0.8441    | 0.7098                  | 1           |



**Table S3.** Fractional atomic coordinates and isotropic displacement parameters ( $\text{\AA}^2$ ) of LBGW:12% Dy<sup>3+</sup>,3% Tm<sup>3+</sup>.

| Atom | <i>x</i>  | <i>y</i>  | <i>z</i>   | <i>B</i> <sub>iso</sub> | <i>Occ.</i> |
|------|-----------|-----------|------------|-------------------------|-------------|
| W1   | 0.4878(4) | 0.4407(3) | 0.4057(6)  | 0.8110(2)               | 1           |
| W2   | 0.5015(9) | 0.7427(2) | 0.3499     | 0.7536(9)               | 1           |
| Ba3  | 1.0000    | 0.5314(9) | 0.2500     | 0.7250(7)               | 1           |
| Y4   | 1.0024(2) | 0.6458(8) | 0.4677(5)  | 0.2673(8)               | 0.75        |
| Li4  | 1.0024(2) | 0.6458(8) | 0.4677(5)  | 0.2673(8)               | 0.25        |
| Li5  | 0.5000    | 0.2794(8) | 0.2500     | 0.7179(6)               | 1           |
| O1   | 0.6469(6) | 0.4203(3) | 0.3272(1)  | 0.8103(7)               | 1           |
| O2   | 0.2650(1) | 0.5466(3) | 0.3981(6)  | 0.7041(1)               | 1           |
| O3   | 0.7662(3) | 0.4876(2) | 0.4561(6)  | 1.0445                  | 1           |
| O4   | 0.3158(8) | 0.3283(1) | 0.4444(8)  | 0.7508(7)               | 1           |
| O5   | 0.2862(7) | 0.7068(9) | 0.2819     | 1.0667(9)               | 1           |
| O6   | 0.7834(1) | 0.6596(4) | 0.3625(8)  | 0.6443(7)               | 1           |
| O7   | 0.6363(8) | 0.8708(4) | 0.3267(2)  | 0.5523(2)               | 1           |
| O8   | 0.3258(5) | 0.7534(8) | 0.4316(15) | 0.4434                  | 1           |
